# Supplementary material
Source: Springer Nature journal article supplement (https://www.springermedizin.de/resource/supplementary/12936_2009_1139_MOESM4_ESM.pdf/9549956)

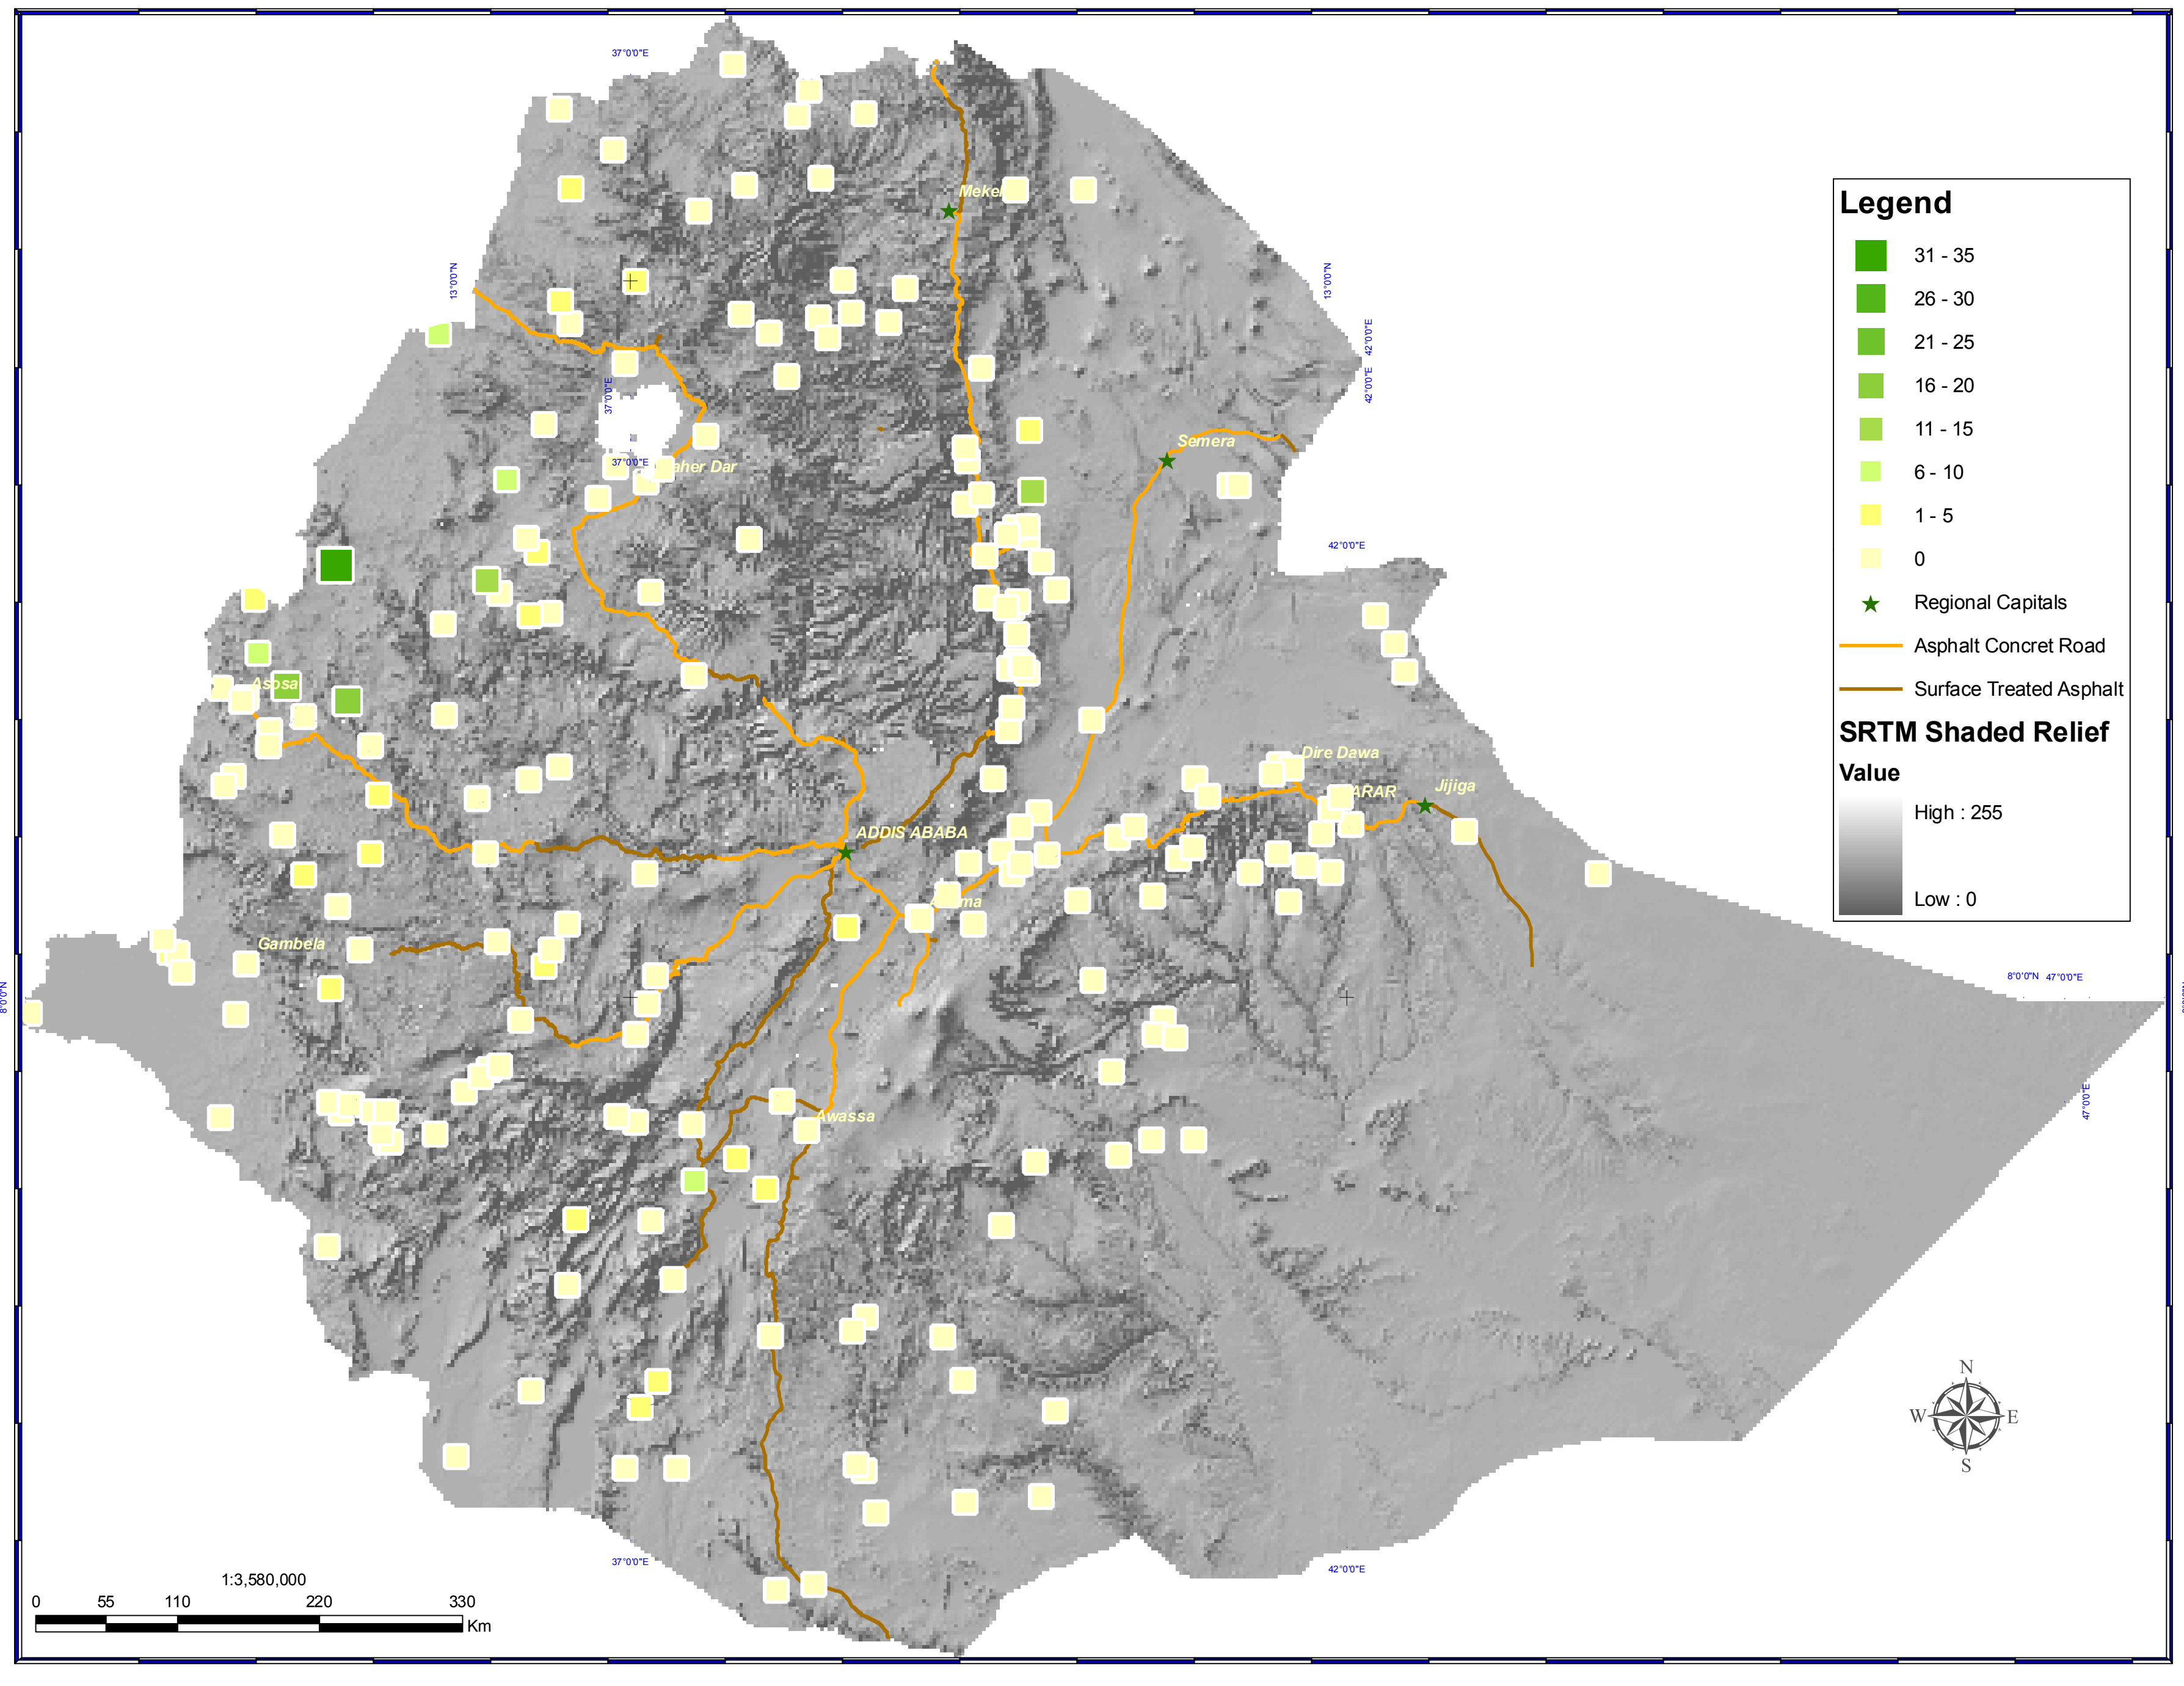

**Legend**

- 31 - 35
- 26 - 30
- 21 - 25
- 16 - 20
- 11 - 15
- 6 - 10
- 1 - 5
- 0
- ★ Regional Capitals
- Asphalt Concret Road
- Surface Treated Asphalt

**SRTM Shaded Relief**

**Value**

High : 255

Low : 0

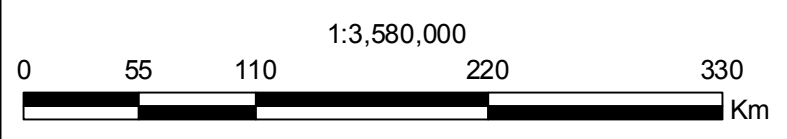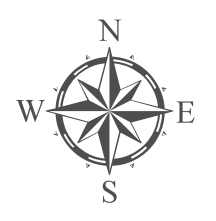

Supplement: MOESM4 [file 9549956]
